# Supplementary material
Source: PubMed Central journal article supplement (PMC3611332)
Supplement: NIHMS435575-supplement-01.pdf [file NIHMS435575-supplement-01.pdf]

**Supplemental Table 1.** Primer Sequences

| Gene                  | 5' primer              | 3' primer                | Product size (bp) |
|-----------------------|------------------------|--------------------------|-------------------|
| Shh                   | CTGCTGGTATGCTCGGGACT   | AAGCGTTCAACTTGCCTTACACCT | 117               |
| Ihh                   | CCGAACCTTCATCTTGGTG    | ACAGATGGAATGCGTGTGAA     | 124               |
| Patched               | ATGCTCCTTTCCTCCTGAAACC | TGAACTGGGCAGCTATGAAGTC   | 168               |
| FRP-1                 | CGTGCGCGACTCGTG        | AACTCGTTGTCGCATGGA       | 173               |
| Gli 2                 | CCATTCATAAGCGGAGCAAG   | CCAGGTCTTCCTTGAGATCG     | 105               |
| Collagen I $\alpha$ 1 | GAGCGGAGAGTACTGGATCG   | GCTTCTTTTCCTTGGGGTTC     | 158               |
| CK7                   | TAGAGTCCAGCATCGCAGAG   | CACAGGTCCCATTCCGTC       | 239               |
| CK19                  | GTGAAGATCCGCGACTGGT    | AGGCGAGCATTGTCAATCTG     | 151               |
| HNF-6                 | ACTCAAGTCGGGTCGGGAGA   | TGGAGCCGCCCTCGTC         | 340               |
| TGF-B1                | TTGCCCTCTACAACCAACACAA | GGCTTGCGACCCACGTAGTA     | 103               |
| 18s                   | TTGACGGAAGGGCACCACCAG  | GCACCACCACCCACGGAATCG    | 130               |

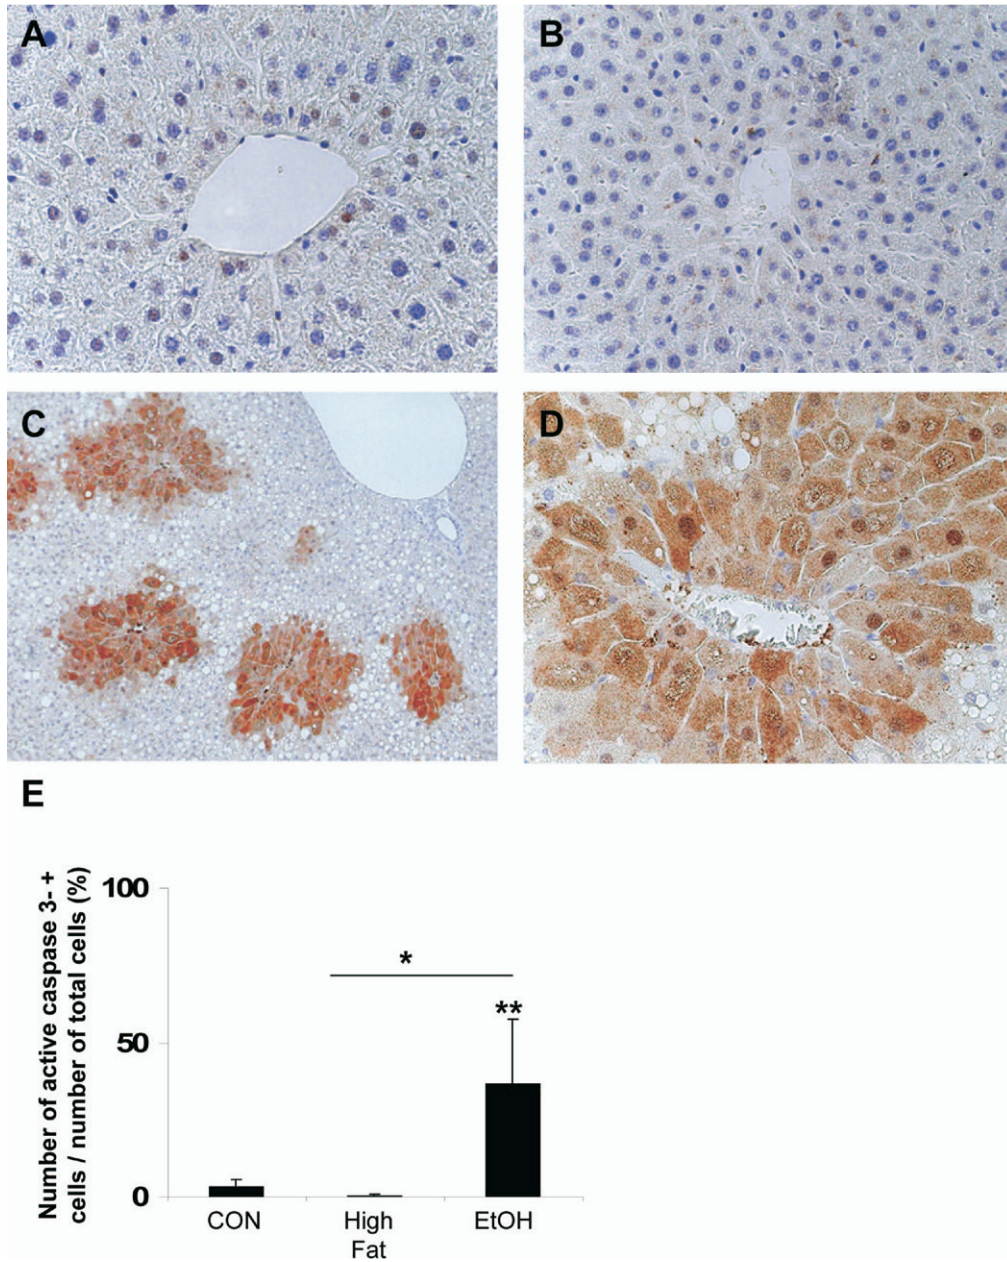

**Supplementary Figure 1.** Increased caspase 3 activity in EtOH-induced steatohepatitis. Active Caspase 3-stained liver sections from representative chow-fed controls (A) ( $\times 40$ ), HF-fed mice (B) ( $\times 40$ ) and HF + EtOH group (C,  $\times 10$ ; and D,  $\times 40$ ). Numbers of active caspase (+) cells in chow-fed controls (CON,  $n = 4$ ), HF mice ( $n = 4$ ), and HF + EtOH mice ( $n = 9$ ) (E). Results graphed in E are expressed as mean  $\pm$  SD (\* $P < .05$ ; \*\* $P < .005$ ).

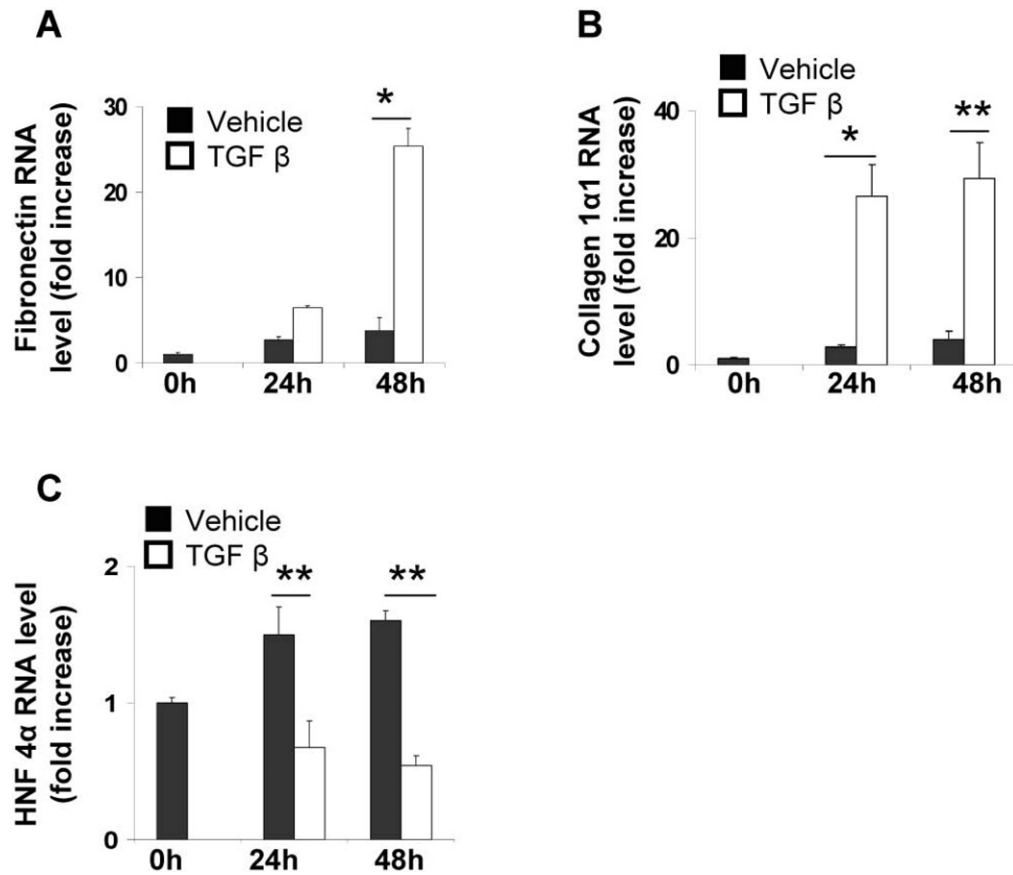

**Supplementary Figure 2.** Changes in gene expression in TGF $\beta$ -1 treated AML-12 cells. Treatment of AML-12 cells with TGF $\beta$ -1 (2 ng/mL) for 24-hour increased expression of the mesenchymal markers, fibronectin (A) and collagen 1 $\alpha$ 1 (B), but decreased expression of the hepatocyte-enriched transcription factor, hepatocyte nuclear factor (HNF)-4 $\alpha$  (C). (\* $P$  < .05, \*\* $P$  < .005).
